# Supplementary material
Source: Springer Nature journal article supplement (https://www.springermedizin.de/resource/supplementary/13002_2009_156_MOESM2_ESM.pdf/9627282)

Location of Ethiopia

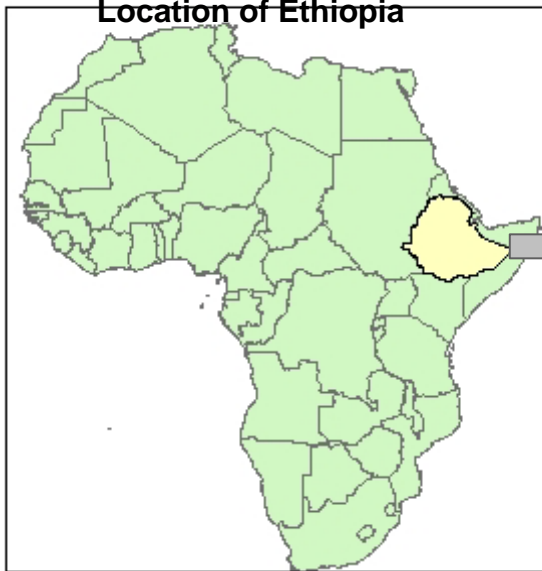

Location of the study area

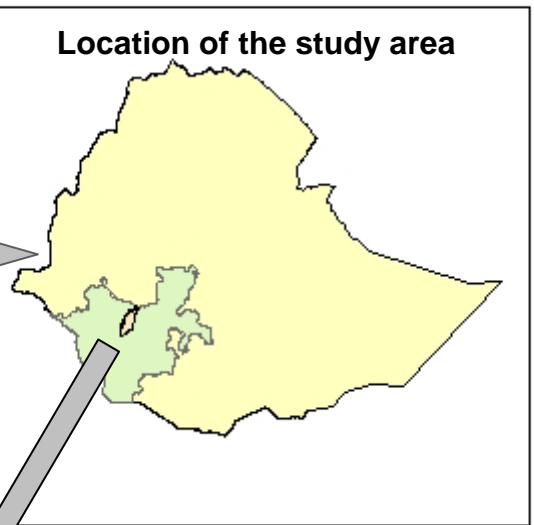

36°30'0"E

36°45'0"E

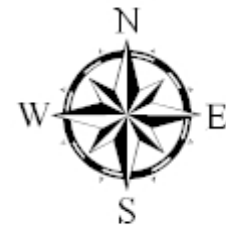

**Legend**

-  Road
-  Rivers
-  Konta Special Woreda

**Study Sites**

name

-  Ameya
-  Bake Ferda
-  Chebera Shasho
-  Cheta Kechkecha
-  Chida
-  Delba Genet
-  Konta Koisha
-  Mojo
-  Weshi Delba

**Kilometers**

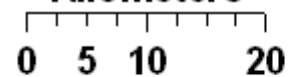

Spatial Reference:  
GCS\_WGS\_1984

7°15'0"N

7°15'0"N

7°0'0"N

7°0'0"N

6°45'0"N

6°45'0"N

36°30'0"E

36°45'0"E

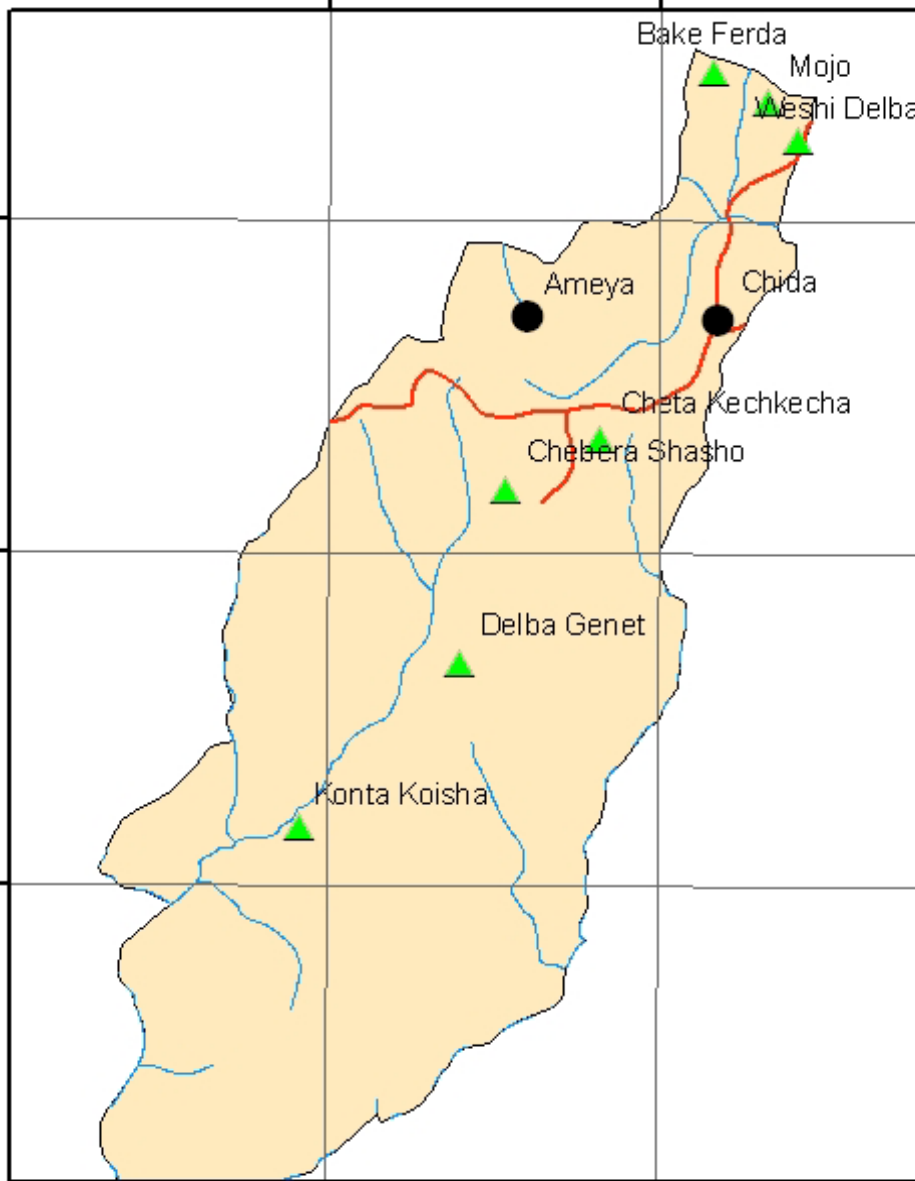

Supplement: MOESM2 [file 9627282]
